# Supplementary material for: Preparation and characterization of triptycene-based microporous poly(benzimidazole) networks
Source: Royal Society of Chemistry journal article supplement (doi:10.1039/c2jm31187a), 2012-01-01
Supplement: c2jm31187a.pdf [file c2jm31187a.pdf]

Electronic supplementary information (ESI) for

# **Preparation and characterization of tritycene-based microporous poly(benzimidazole) networks**

Yan-Chao Zhao,<sup>a,b</sup> Qian-Yi Cheng,<sup>a</sup> Ding Zhou,<sup>a</sup> Tao Wang,<sup>a</sup> Bao-Hang  
Han<sup>\*,a</sup>

<sup>a</sup> *National Center for Nanoscience and Technology, Beijing 100190, China*

<sup>b</sup> *Graduate University of Chinese Academy of Sciences, Beijing 100049,  
China*

Tel: +86 10 8254 5576. Email: [hanbh@nanoctr.cn](mailto:hanbh@nanoctr.cn).

*Synthesis of 9,10-dimethyltriptycene-2,3,6,7,12,13-hexone*

The monomer 9,10-dimethyl-2,3,6,7,12,13-hexahydroxytriptycene (100 mg) was suspended in ethanol (10.0 mL). To the suspension, a mixture of concentrated nitric acid (1.00 mL) and glacial acetic acid (1.00 mL) was added slowly while the temperature was kept at 0–5 °C. The mixture was stirred at room temperature for 24 h. The hexone product was then collected by filtration and washed with water and ethanol. After dried at 80 °C in a vacuum oven, a brown solid was obtained (56 % yield). M.p.: >300 °C;  $^1\text{H}$  NMR (400 MHz,  $d^6$ -DMSO):  $\delta$  (ppm) 6.48 (s, 6H, Ar-*H*), 1.80 (s, 6H, -*CH*<sub>3</sub>); IR (KBr,  $\text{cm}^{-1}$ ): 3070, 2990, 1661, 1573, 1470, 1390, 1332, 1267, 1150, 1069, 894, 813, 683, 587.

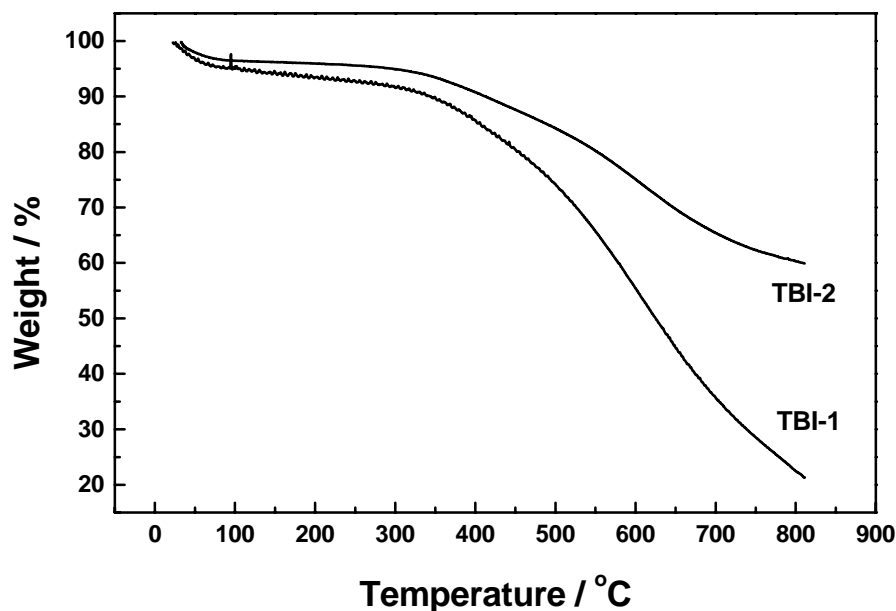

**Figure S1.** Thermogravimetric analysis (TGA) of **TBI-1** and **TBI-2**.

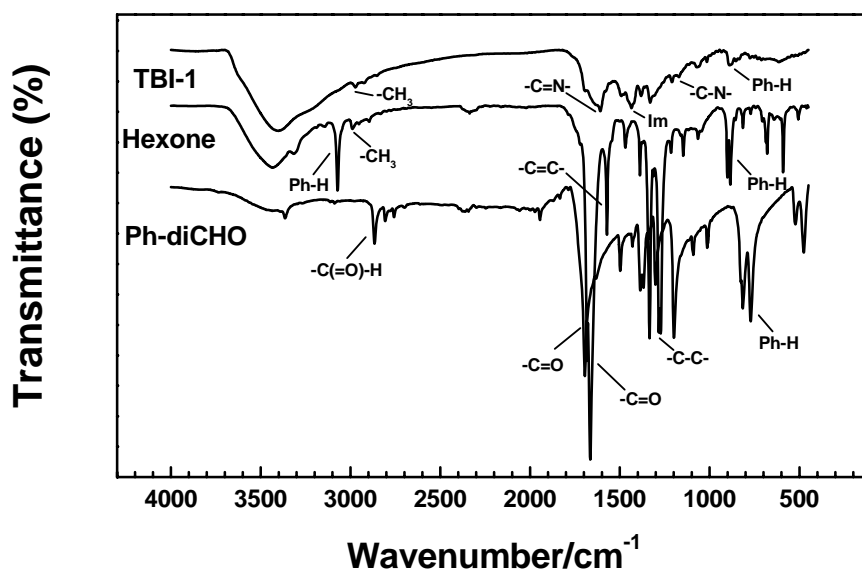

**Figure S2.** FT-IR spectra of hexone monomer, terephthalic aldehyde, and **TBI-1**.

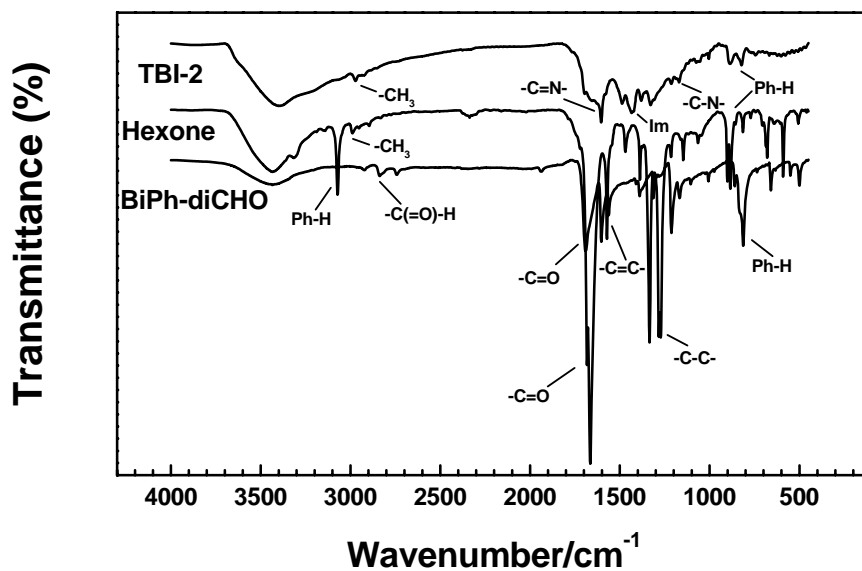

**Figure S3.** FT-IR spectra of hexone monomer, 4,4'-biphenyldicarboxaldehyde, and **TBI-2**.

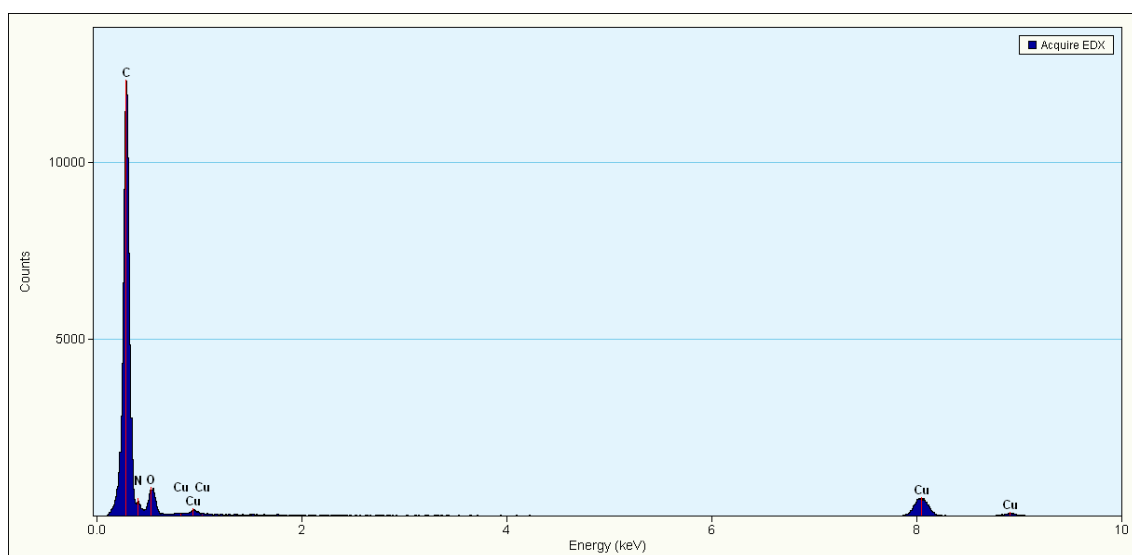

**Figure S4.** EDX spectrum for **TBI-1**.

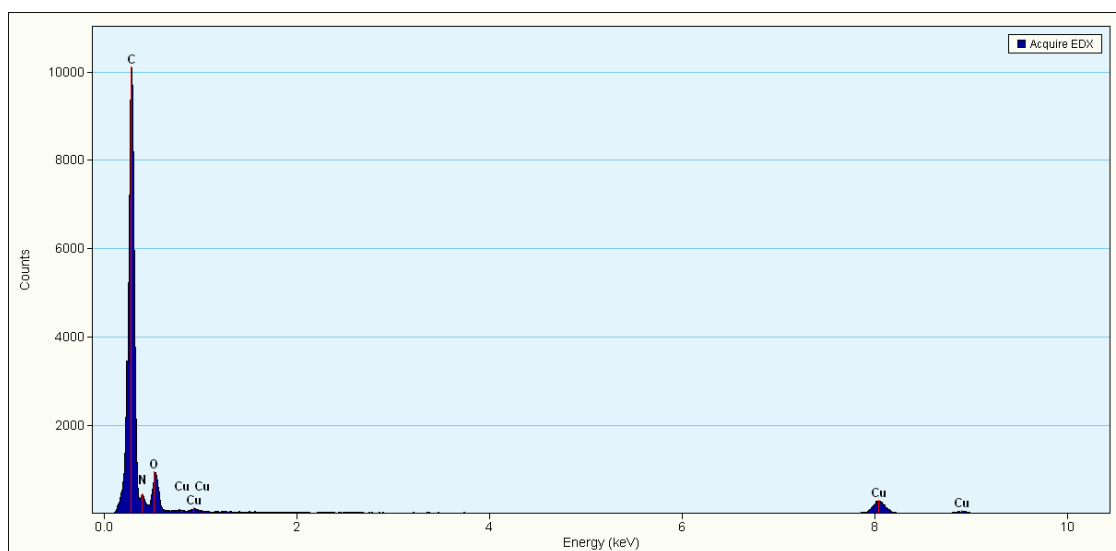

**Figure S5.** EDX spectrum for **TBI-2**.

**Table S1.** Elemental analysis for **TBI-1** and **TBI-2** (wt. %)

|                       | Carbon | Hydrogen | Nitrogen |
|-----------------------|--------|----------|----------|
| <b>TBI-1</b> (Calcd.) | 79.51  | 4.12     | 16.36    |
| <b>TBI-1</b> (Found)  | 69.94  | 4.24     | 15.28    |
| <b>TBI-2</b> (Calcd.) | 81.88  | 4.79     | 13.32    |
| <b>TBI-2</b> (Found)  | 72.62  | 4.10     | 12.37    |

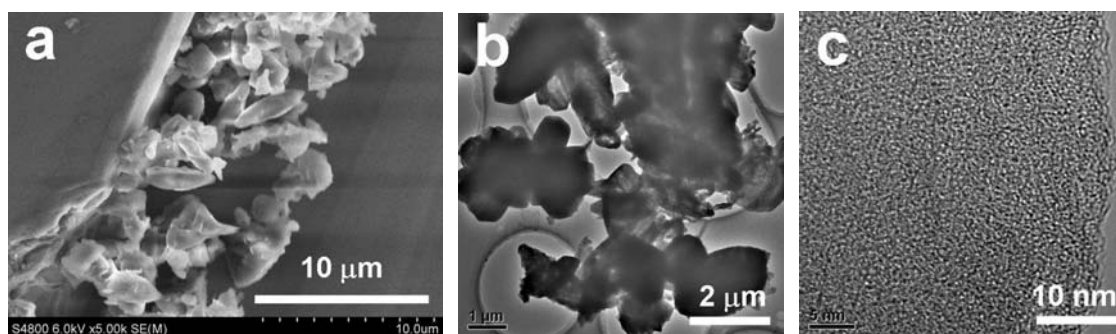

**Figure S6.** SEM (a), TEM (b), and HR-TEM (c) images of **TBI-1**.

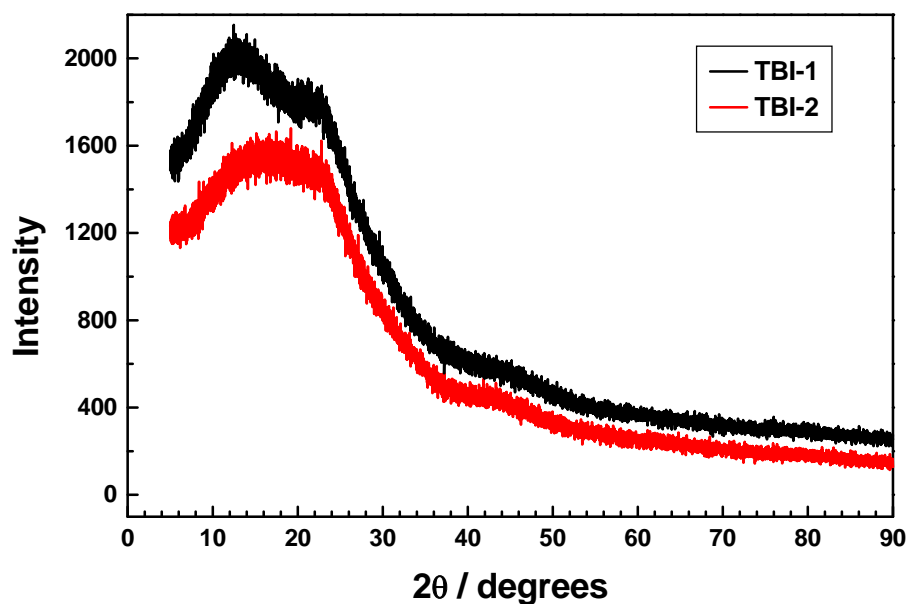

**Figure S7.** X-ray diffraction patterns of **TBI-1** and **TBI-2**.

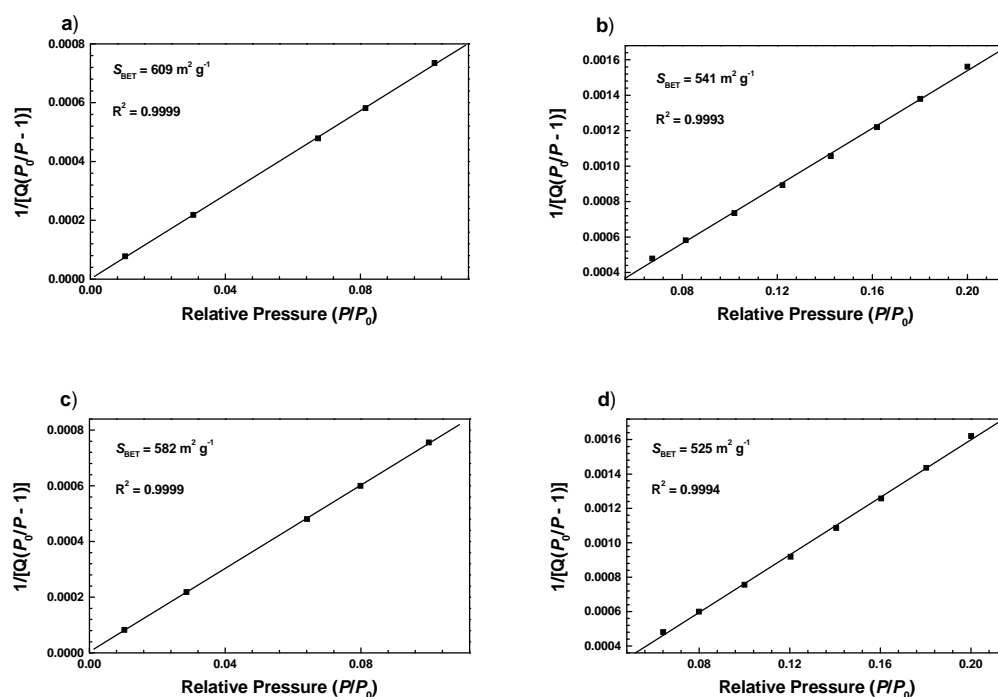

**Figure S8.** BET specific surface area plots for **TBI-1** (a, b) and **TBI-2** (c, d) calculated over different relative pressure ranges:  $P/P_0 = 0.01-0.10$  (a, c) and  $P/P_0 = 0.05-0.20$  (b, d), respectively.

**Table S2.** BET specific surface area data calculated over different pressure ranges

| Sample       | $P/P_0$ range | $S_{\text{BET}} (\text{m}^2 \text{ g}^{-1})$ | Correlation coefficient | Points | $C$ constant <sup>a</sup> |
|--------------|---------------|----------------------------------------------|-------------------------|--------|---------------------------|
| <b>TBI-1</b> | 0.01–0.10     | 609                                          | 0.9999                  | 5      | 12292                     |
| <b>TBI-1</b> | 0.05–0.20     | 541                                          | 0.9993                  | 8      | -113                      |
| <b>TBI-2</b> | 0.01–0.10     | 582                                          | 0.9998                  | 5      | 1853                      |
| <b>TBI-2</b> | 0.05–0.20     | 525                                          | 0.9994                  | 8      | -91                       |

<sup>a</sup> The low relative pressure range of 0.01–0.10 using five points gives the higher  $C$  constant values and therefore the best fit to the BET equation.

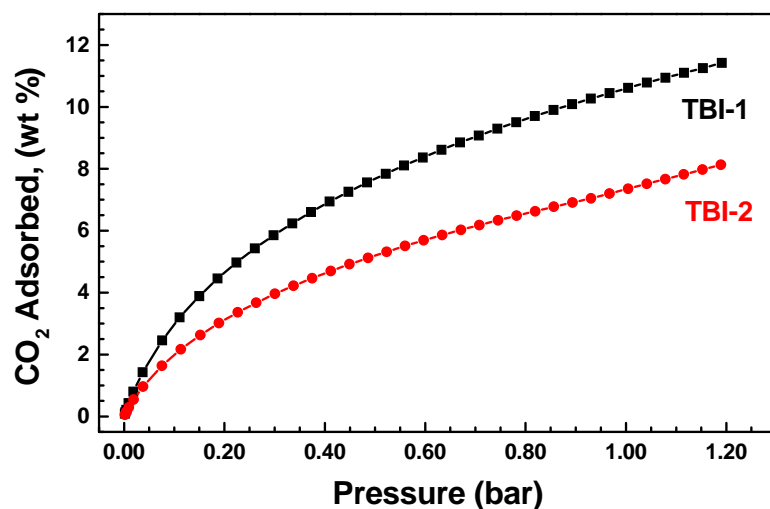

**Figure S9.** Carbon dioxide adsorption isotherms for **TBI-1** (black solid square) and **TBI-2** (red solid circle) at 288 K, respectively.

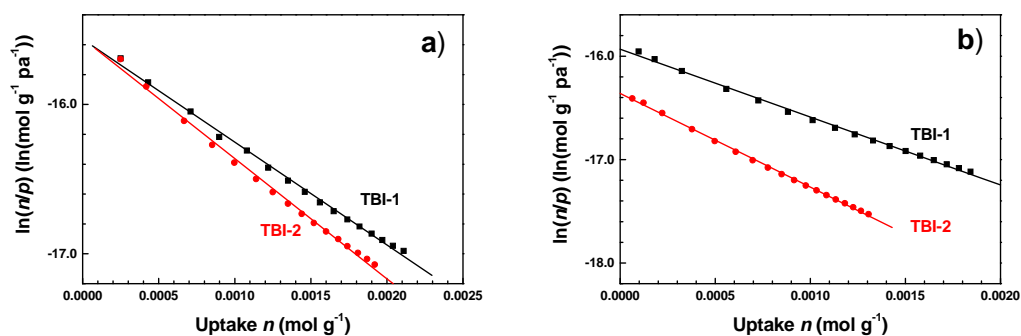

**Figure S10.** Virial analysis of the adsorption data for CO<sub>2</sub> on **TBI-1** (black solid square) and **TBI-2** (red solid circle) at 273 K (a) and 288 K (b) at low pressure range.

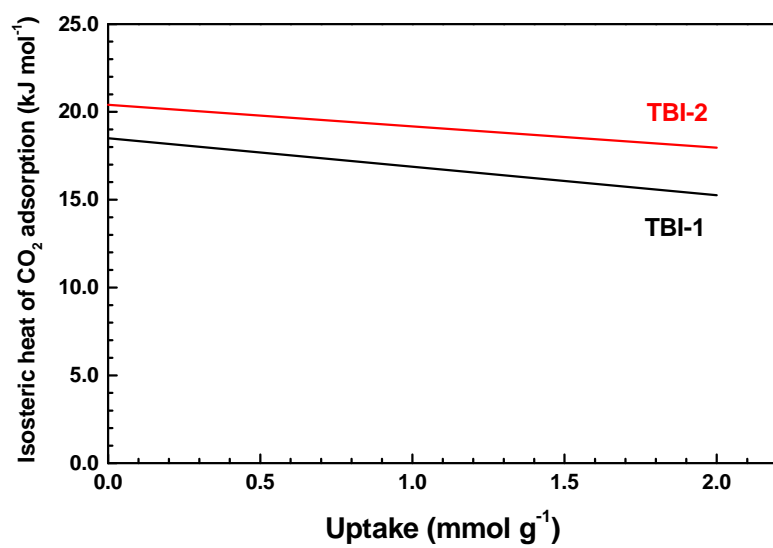

**Figure S11.** Variation of isosteric heat of adsorption with amount of adsorbed CO<sub>2</sub> in TBI-1 (black) and TBI-2 (red).
